# Supplementary material for: Fossilization of Precambrian microfossils in the Volyn pegmatite, Ukraine
Source: Copernicus journal article supplement (doi:10.5194/bg-19-1795-2022), 2022-03-31
Supplement: Supplementary file 1 [file bg-19-1795-2022-supplement.pdf]

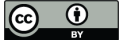

*Supplement of*

## **Fossilization of Precambrian microfossils in the Volyn pegmatite, Ukraine**

**Gerhard Franz et al.**

*Correspondence to:* Gerhard Franz ([gefra548@gmail.com](mailto:gefra548@gmail.com))

The copyright of individual parts of the supplement might differ from the article licence.

**Content:**

Fig. S 1: EDS spectra for mineral identification

Fig. S 2: EDS spectra of flaky kerite

Fig. S 3: EDS spectra of filamentous kerite with sheath-like structure

Fig. S 4: BSE images fluorite-buddingtonite

Fig. S 5: BSE images for location of element mappings

Figs. S 6,7: Element mappings

Fig. S 8: TEM data

Fig. S 9: Results of open-system pyrolysis

Table S 1: Chemical composition of black opal

Table S 2: U-Th isotope data

Table S 3: Opal U-Th-Pb isotope data

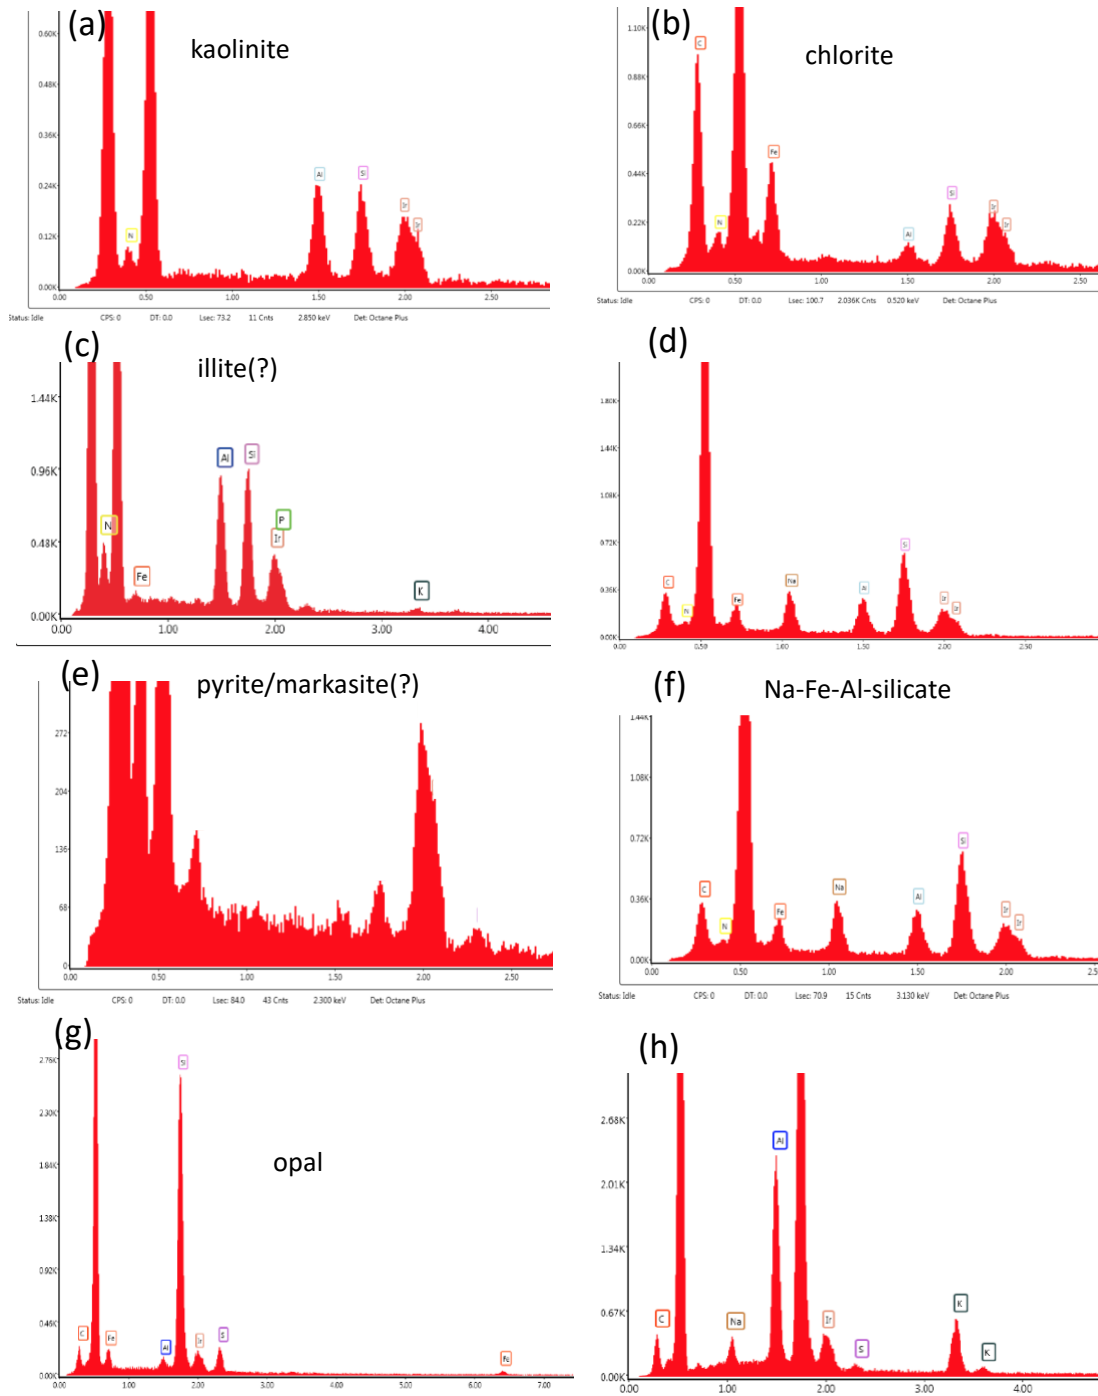

Fig. S1: EDS spectra of minerals and encrustations of filamentous kerite. All mineral identifications were made on the basis of the spectra and morphology, not verified by XRD. (a,b,c) Information to Fig. 3a; (d) to Fig. 3b; (e) to Fig. 3c; (f) to Fig. 3e; (g) to Fig. 3f; (h) to Fig. 3h.

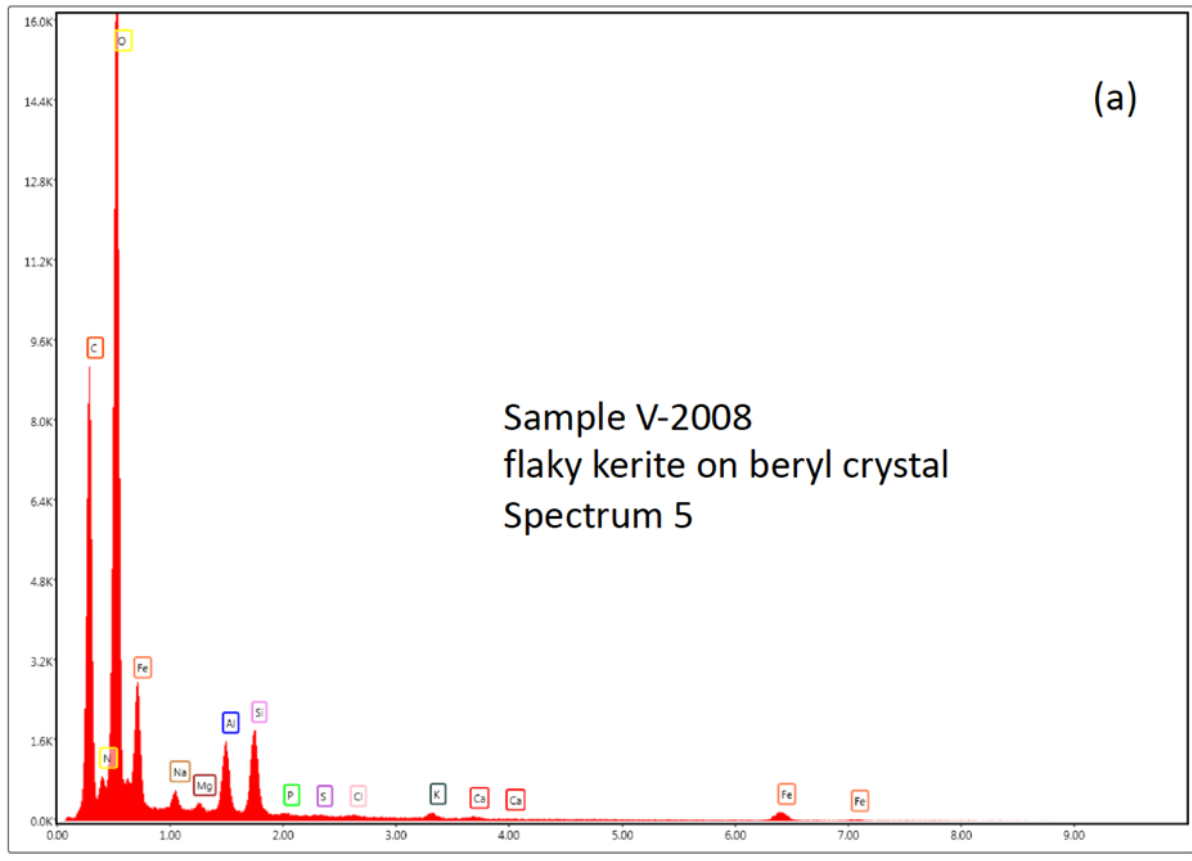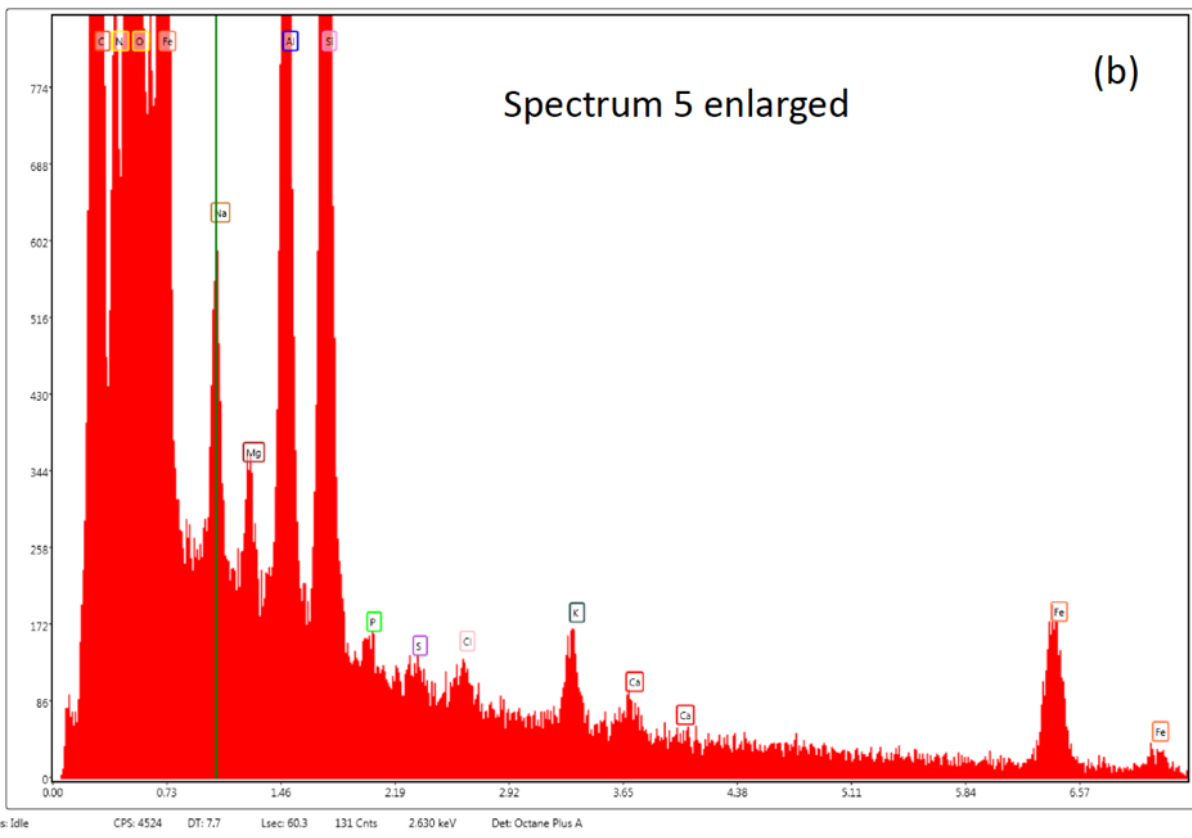

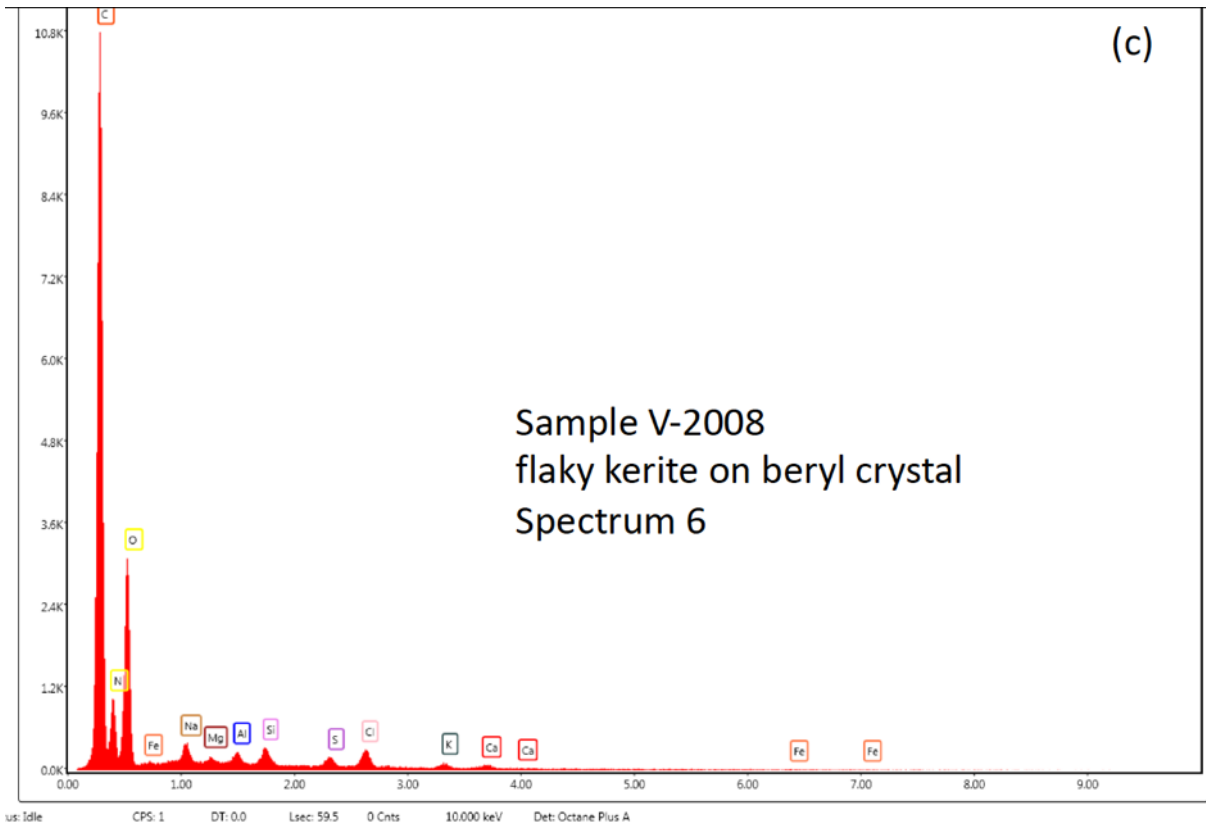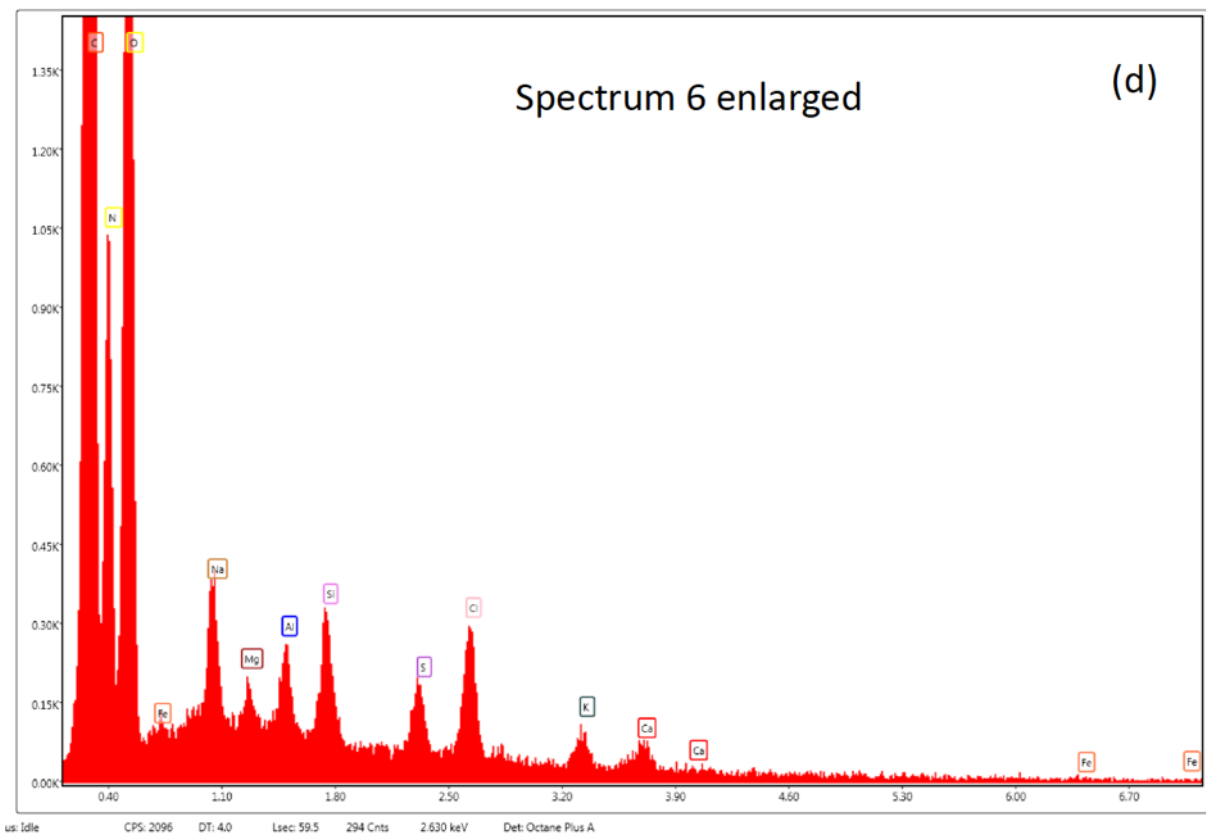

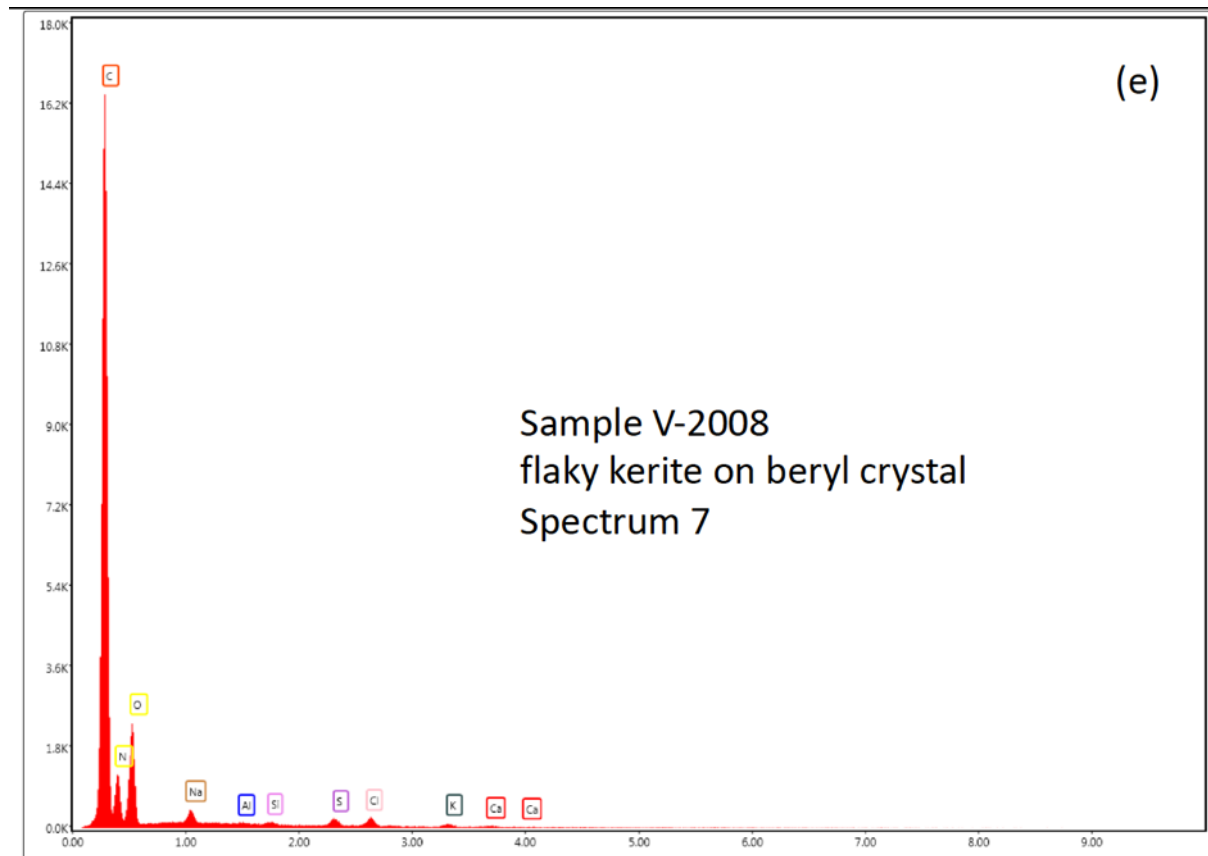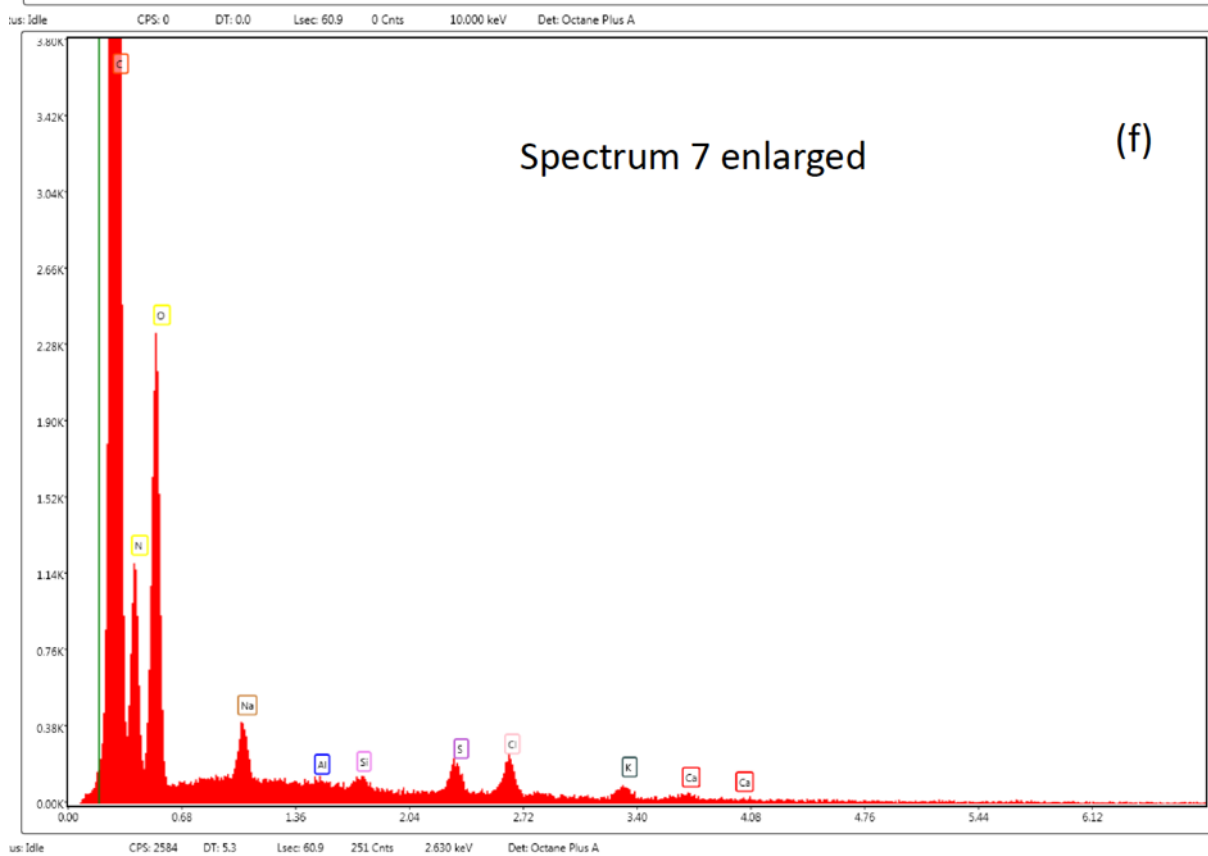

Fig. S2(a-f): EDS spectra 5,6, and 7 of flaky kerite in etch pits of beryl. The sample V-2008 was coated with C (in contrast to the other kerite samples, which were coated with Ir).

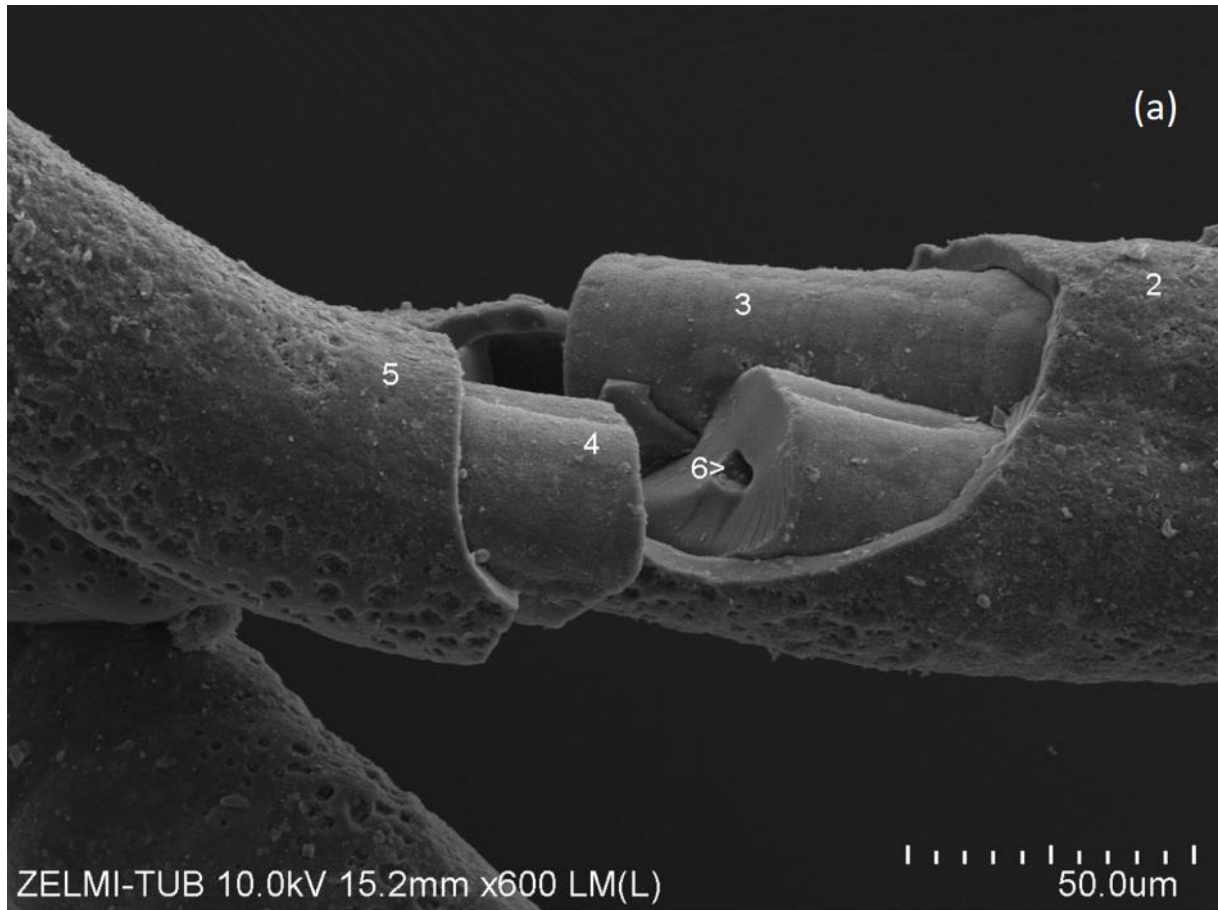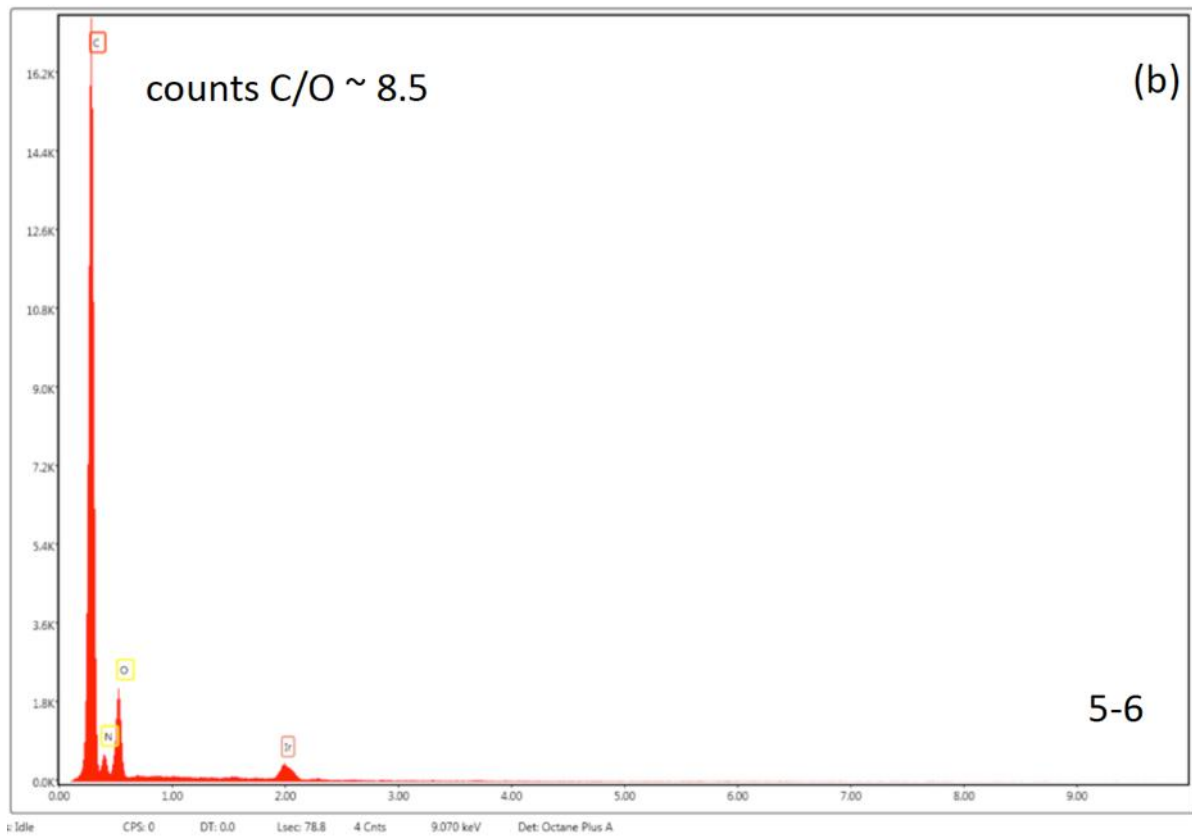

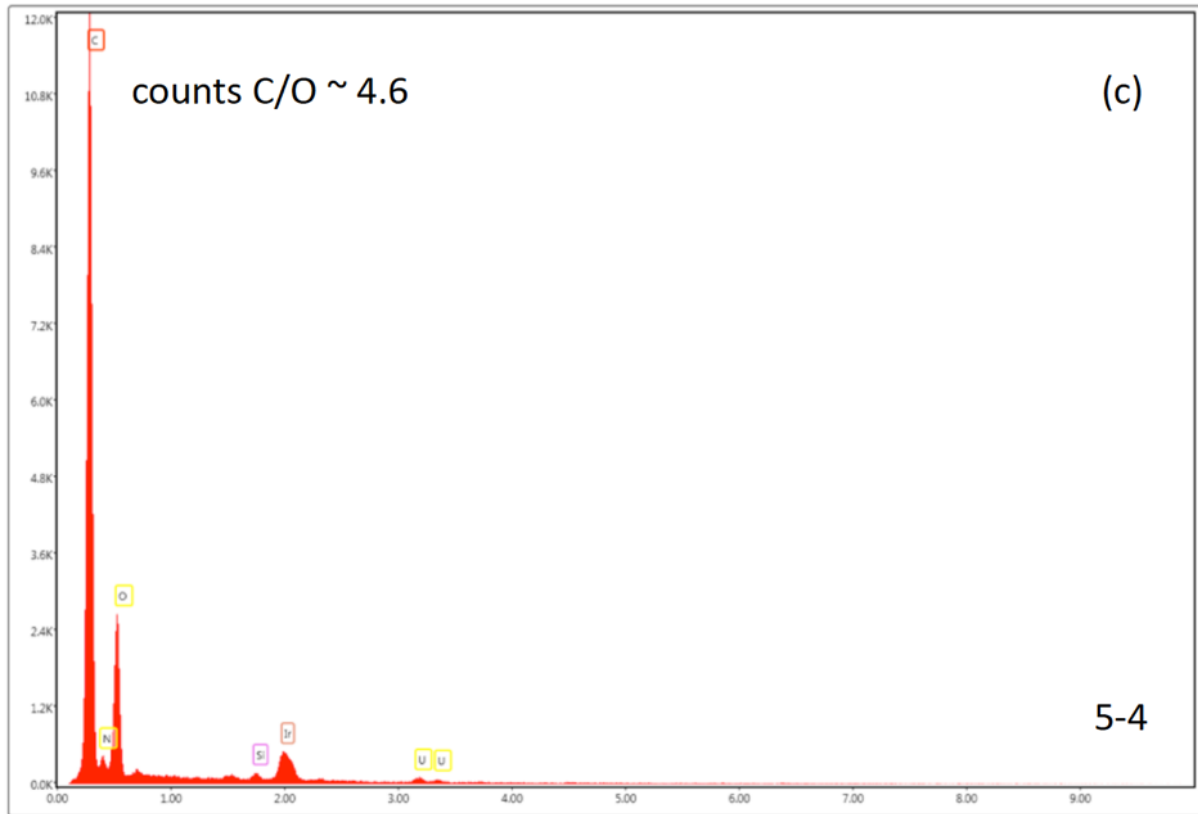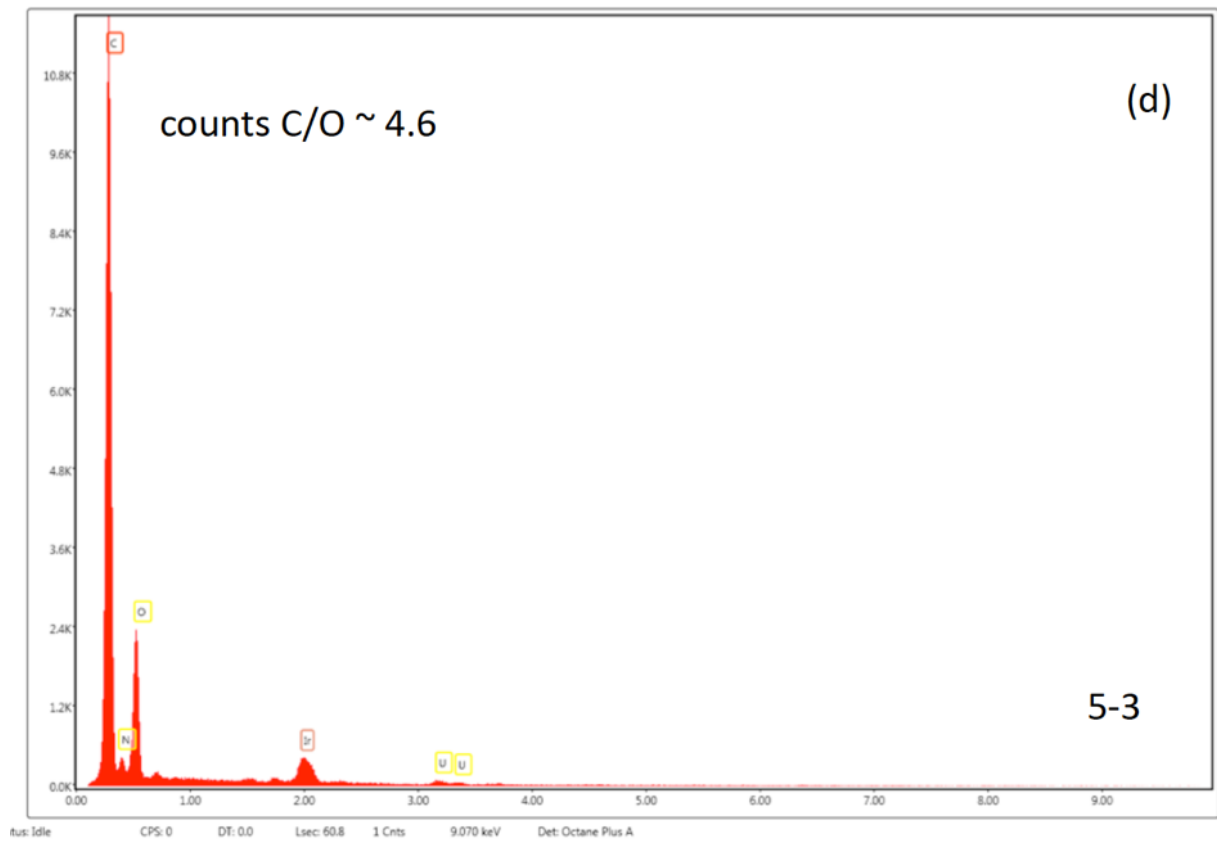



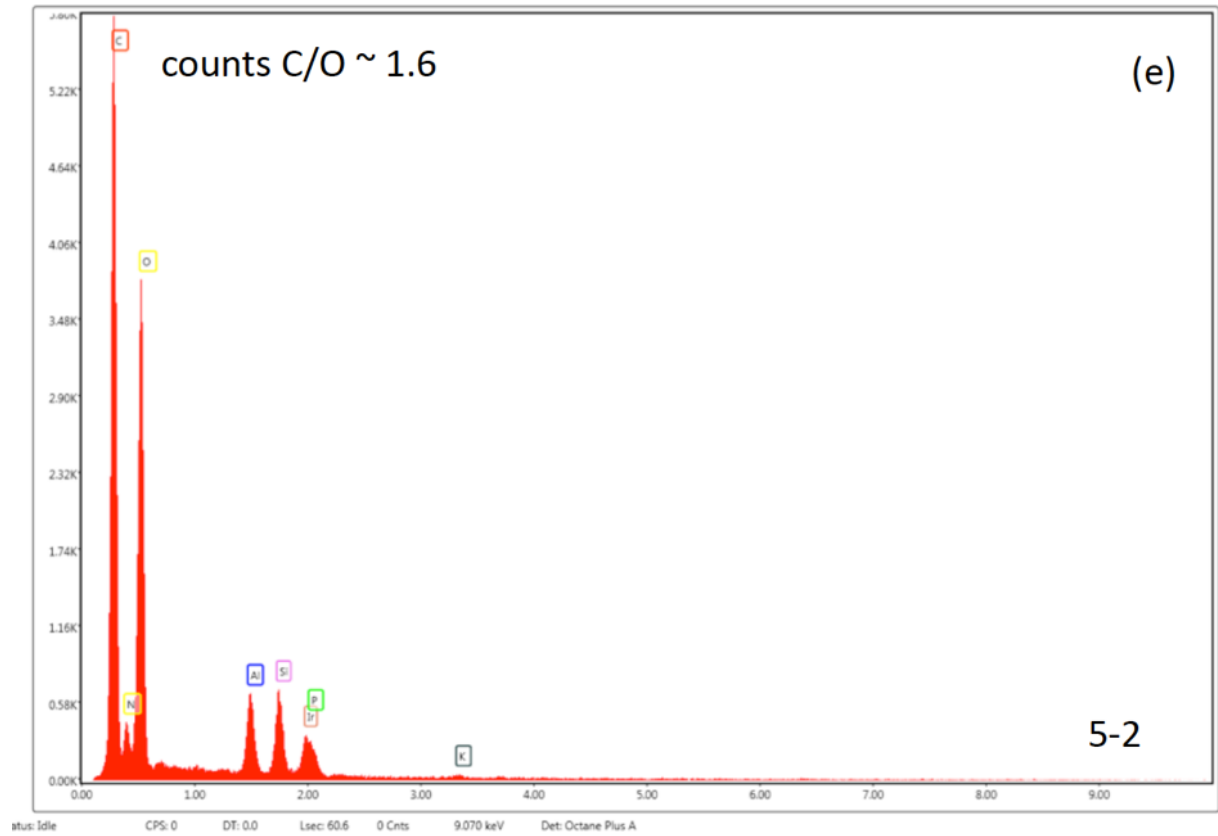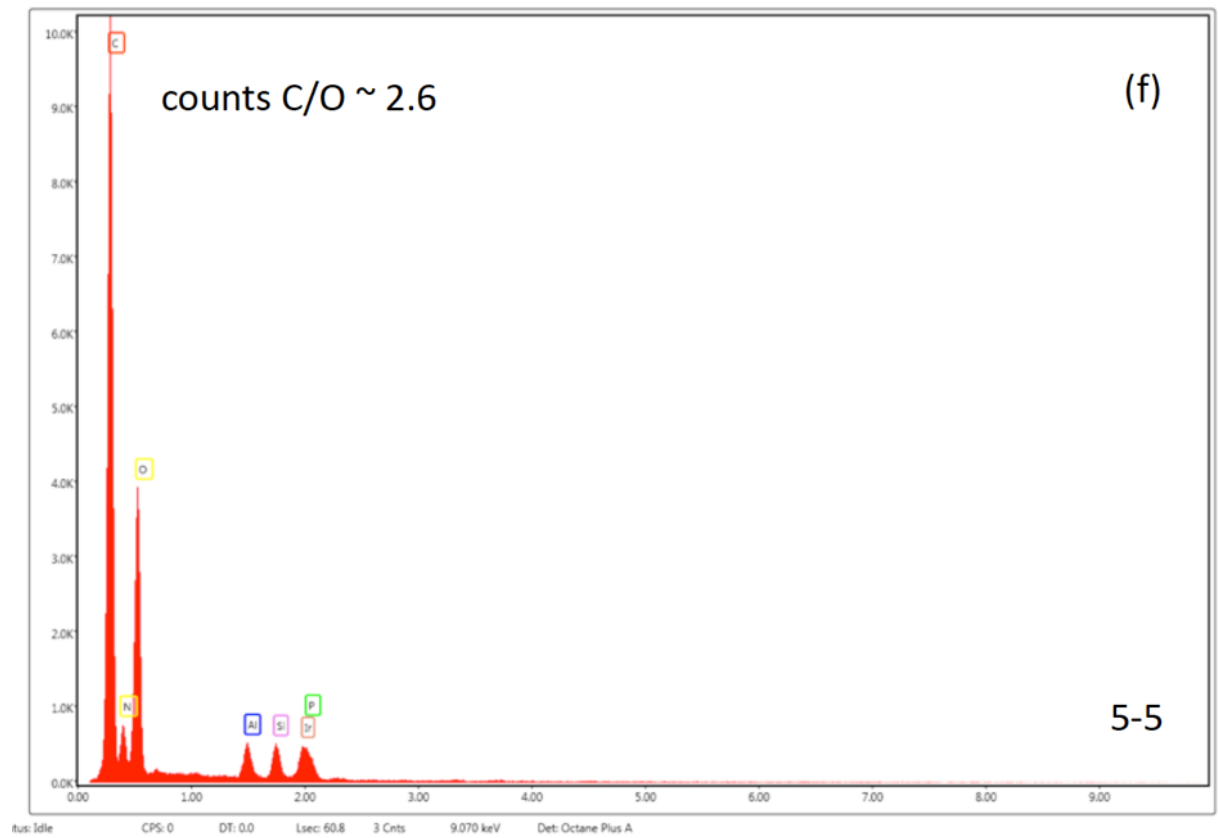

Fig. S3: BSE image (a) and corresponding EDS analyses (b-f), labeled 5-2 to 5-6, of filamentous kerite with sheath-like structure. The peak count ratio for C/O decreases from the central (analysis 6) to the outer part (analyses 5 & 2).

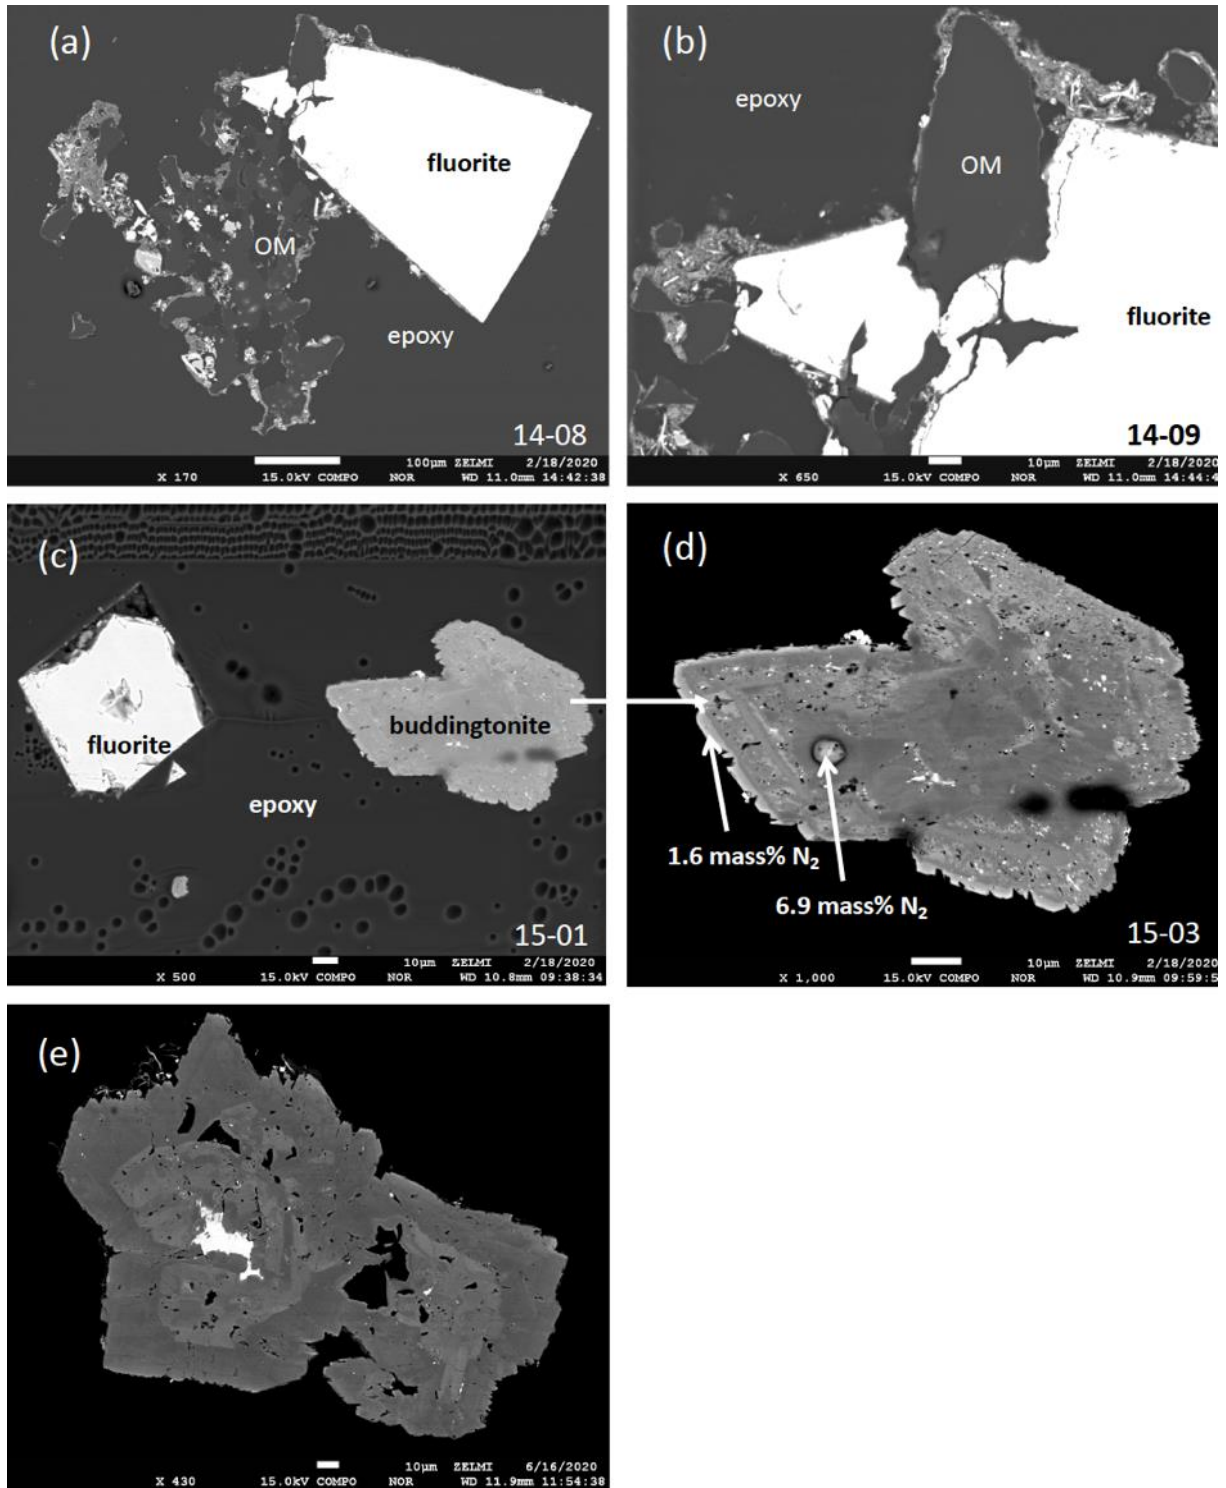

Fig. S4: BSE images of grain mounts in epoxy, showing fluorite, closely intergrown with kerite (OM), and zoned buddingtonite  
 (a,b) Kerite 14  
 (c,d) Kerite 15; inclusions with high contrast are Fe-oxide  
 (e) Kerite 11; outer zones with high contrast are rich in K, poor in NH<sub>4</sub>. Inner, irregular white grain is relict, igneous K-feldspar.

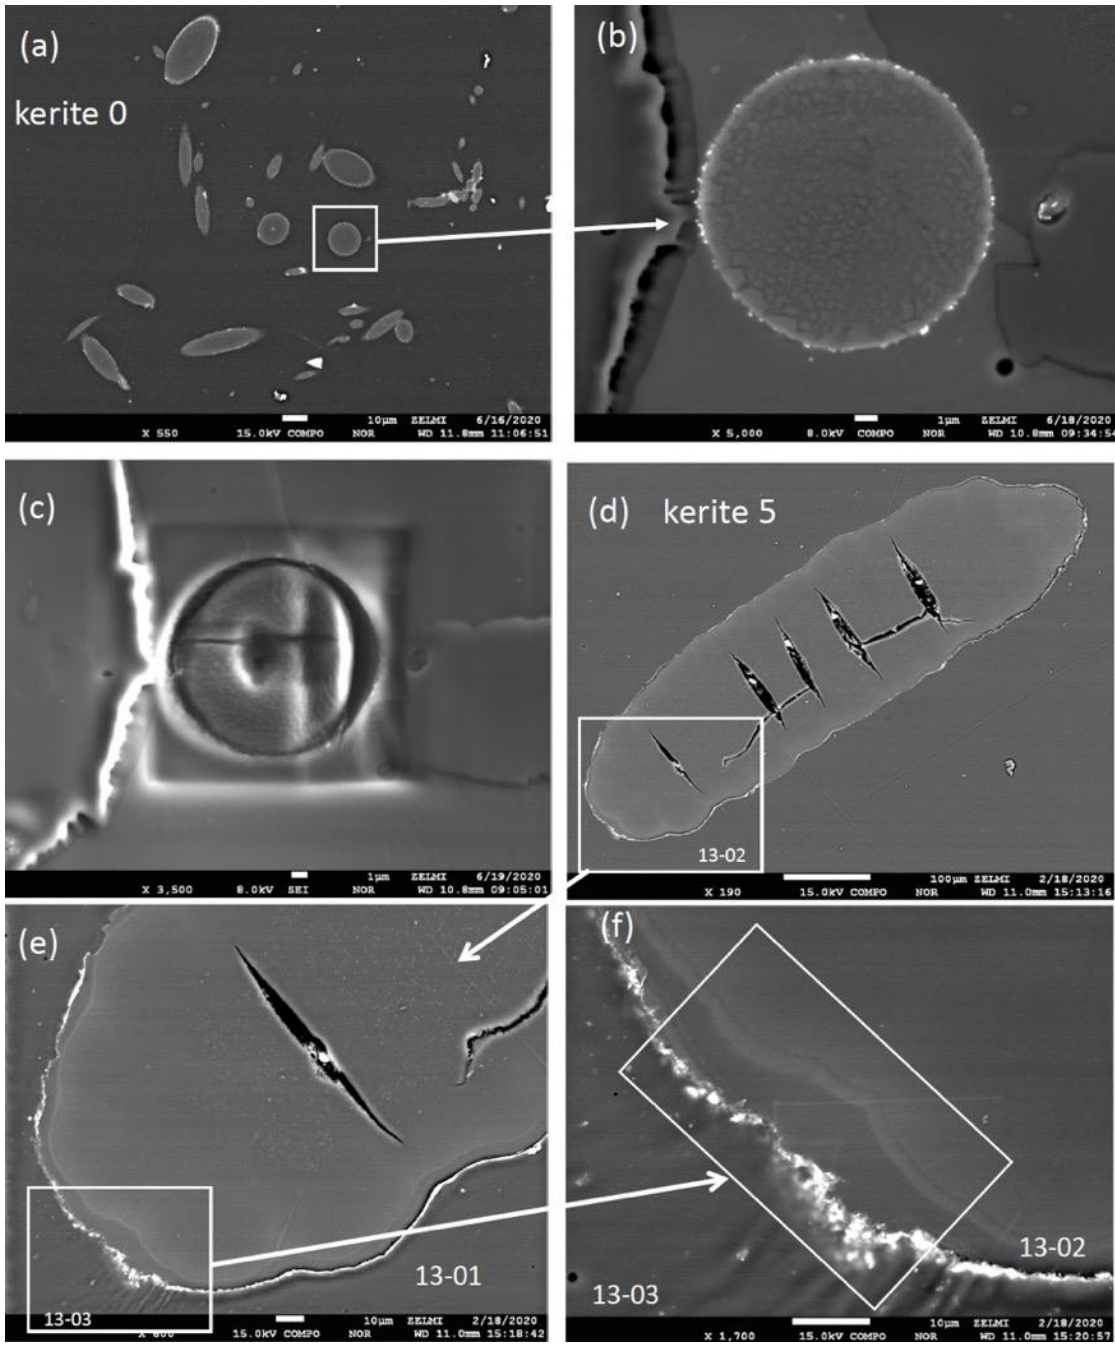

Fig. S5: BSE images of selected areas for element mapping (a, b, e, f); (c) is combined SEM/BSE after mapping. (a,b) are for element distribution maps in Fig. S5.

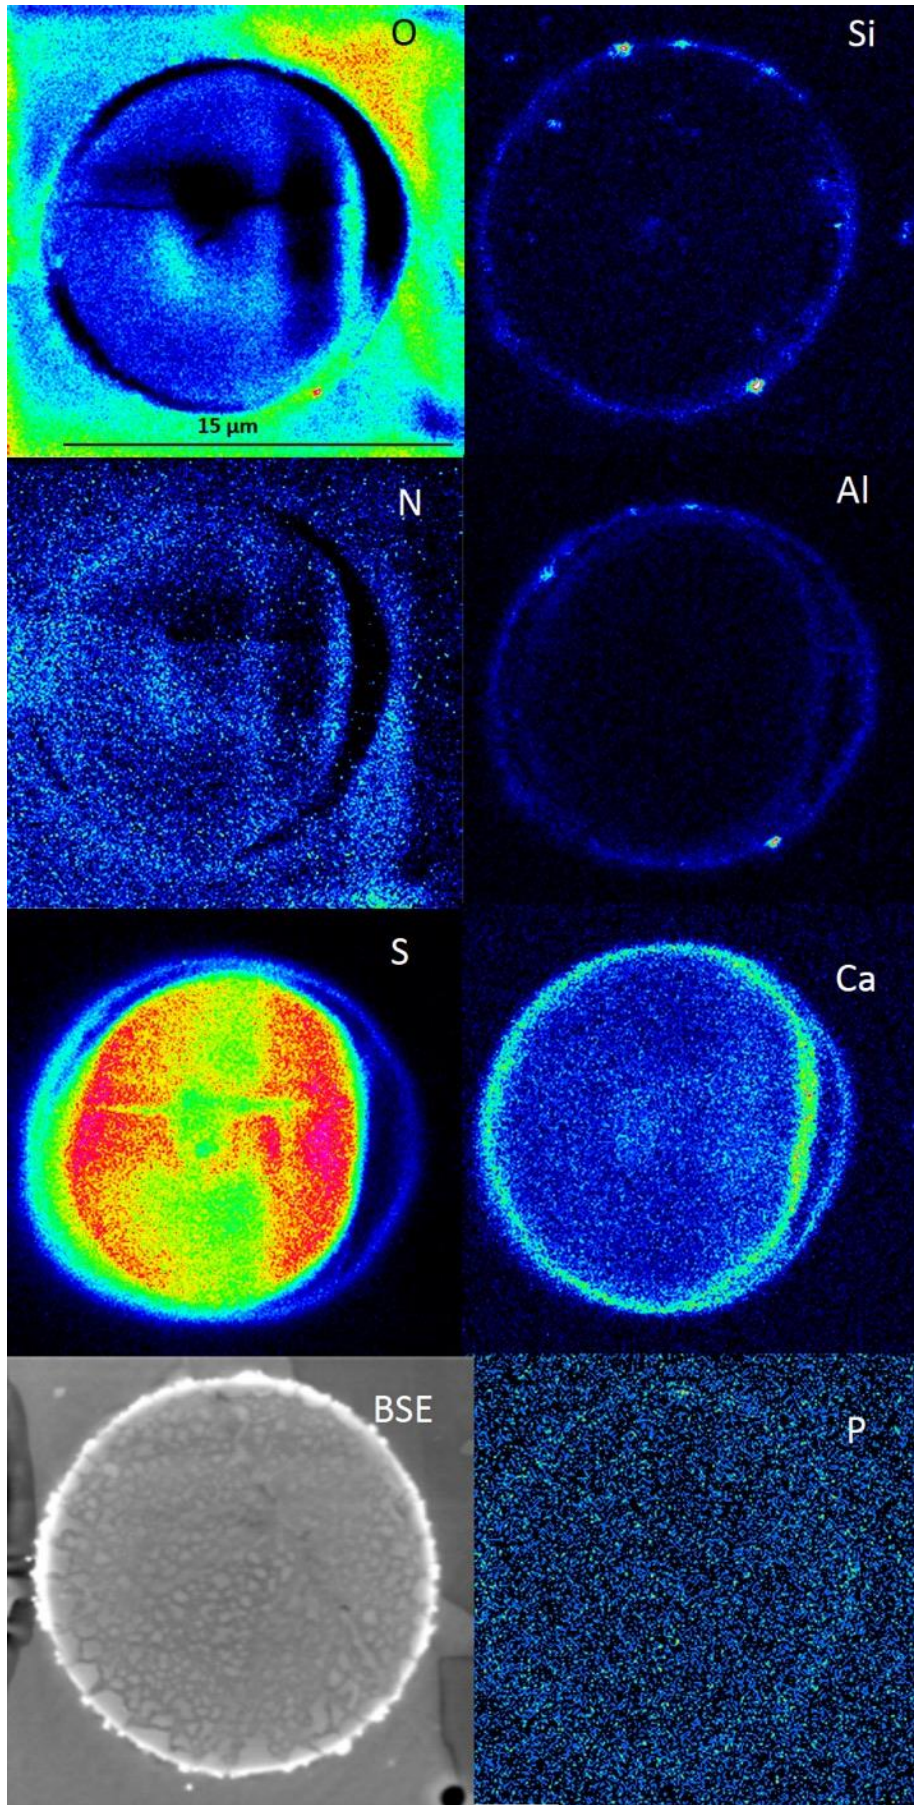

Fig. S6: Element distribution of cross section of filament, sample kerite 0.

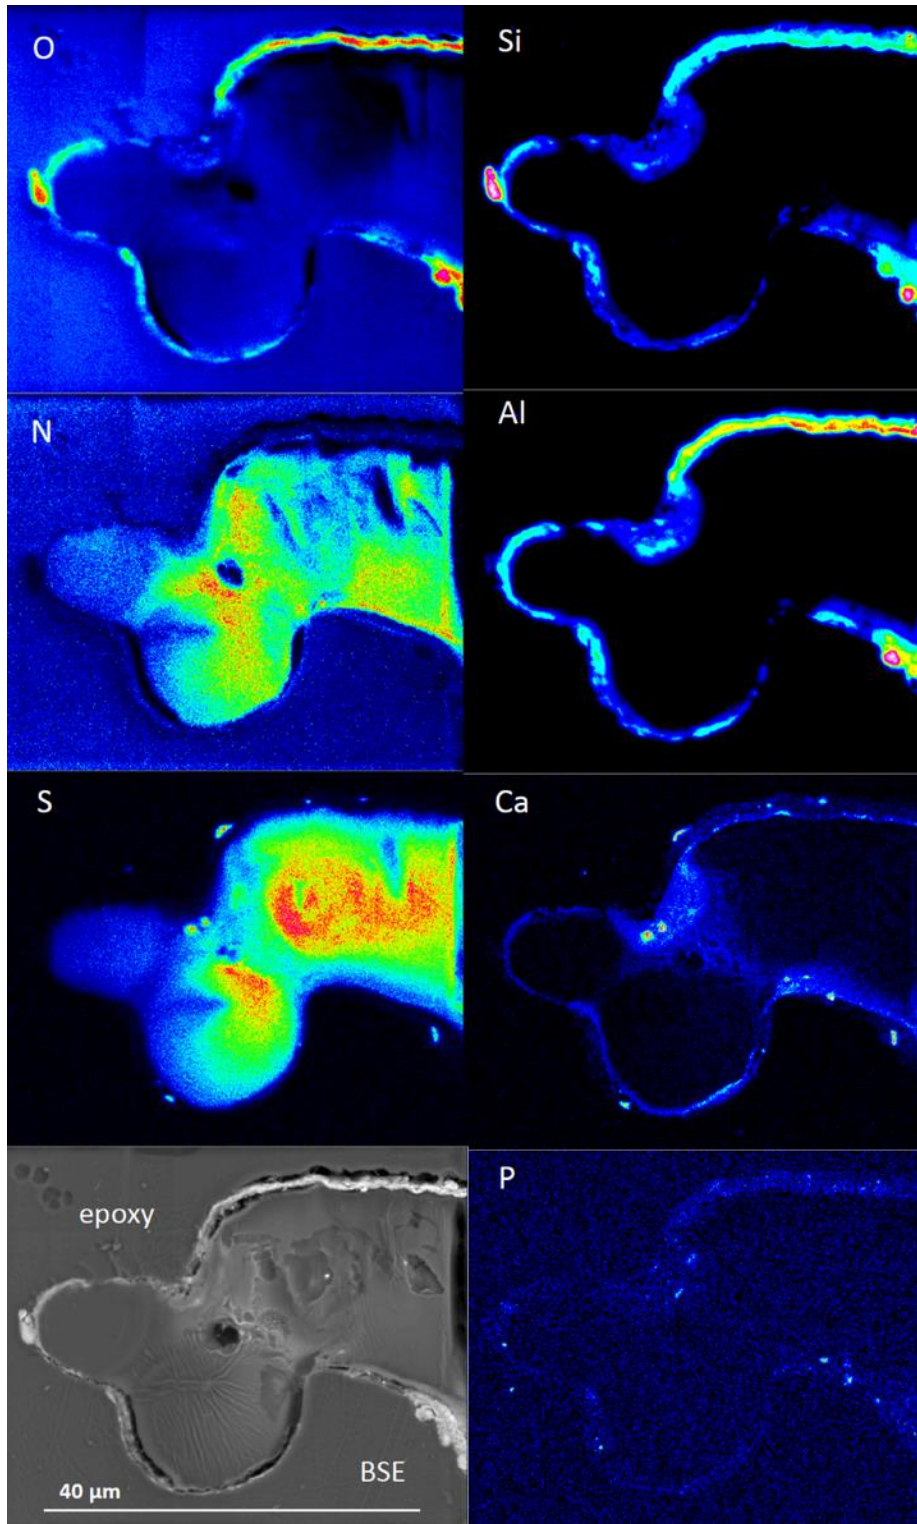

Fig. S7: Element distribution of globular-flaky object of kerite (sample 11). Note clearly visible phosphatization.

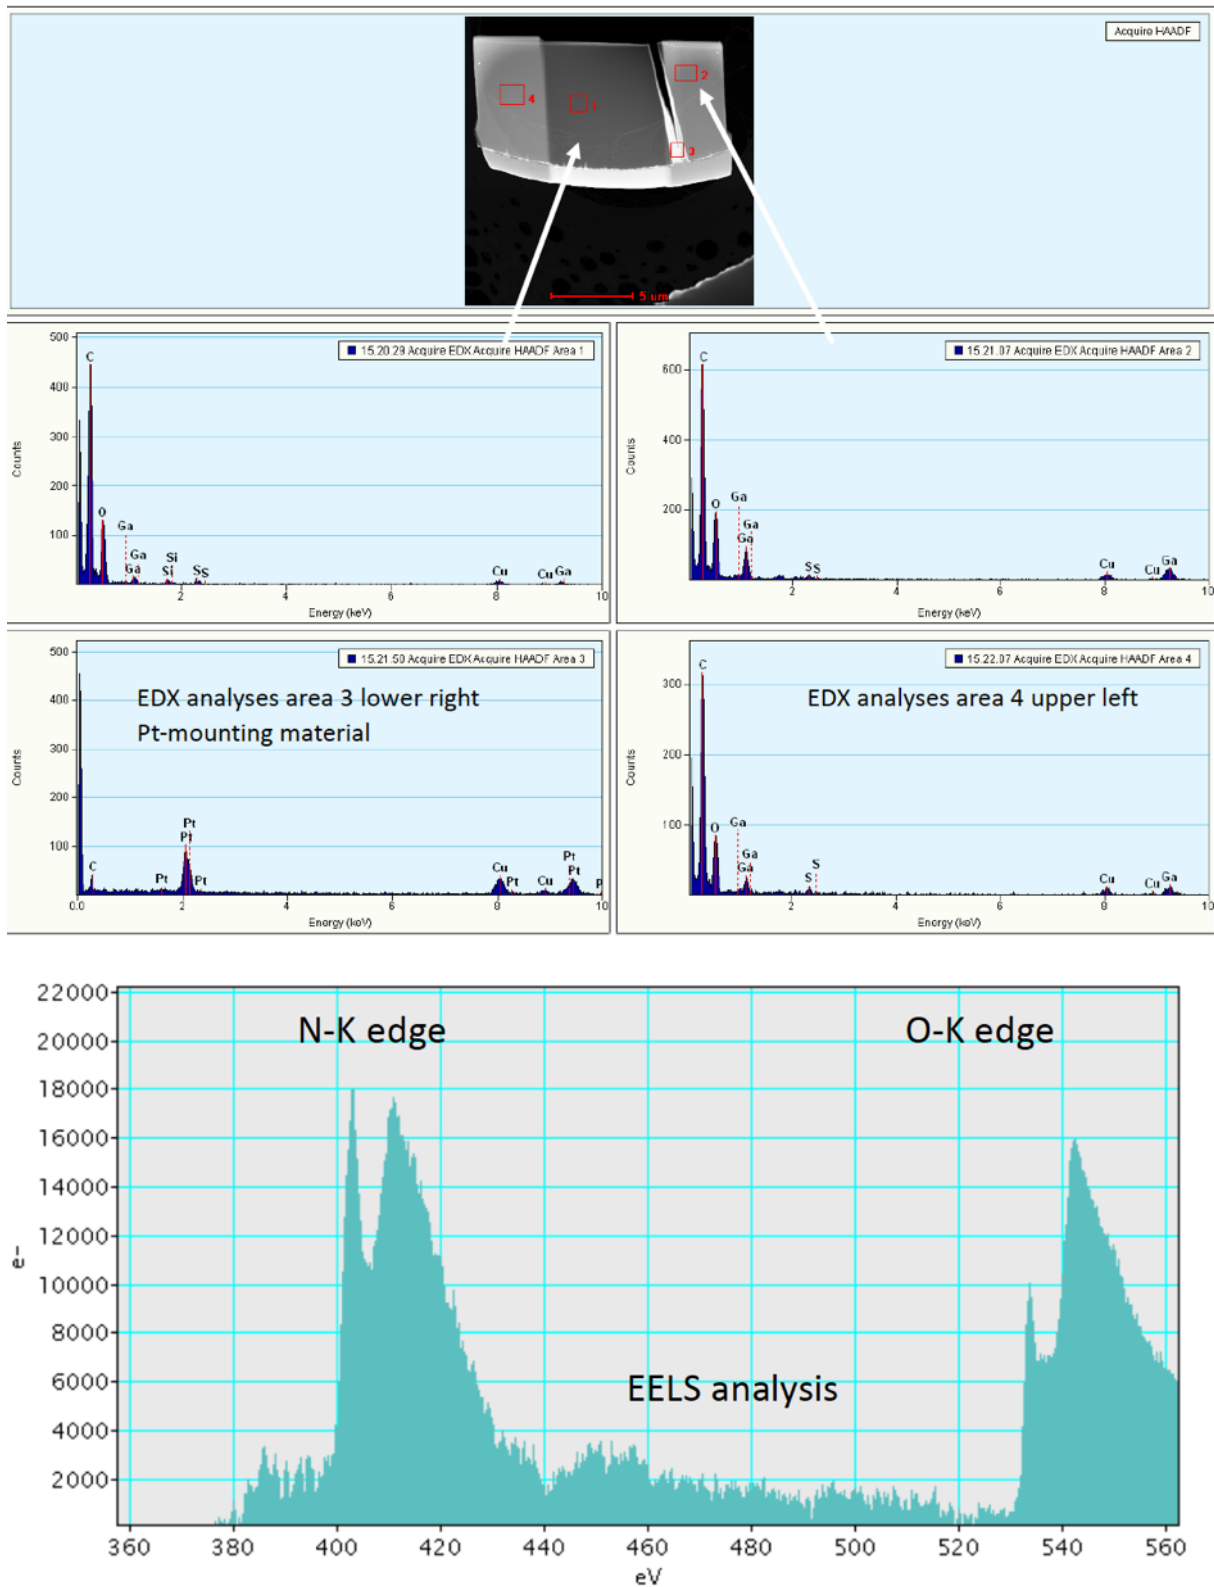

Fig. S8: Analytical TEM investigation, sample kerite 0; FIB foil #5047

## Results of open system pyrolysis

|                 |         |                     |
|-----------------|---------|---------------------|
| kerite 1        | G017809 | mature              |
| kerite 2        | G017810 | mature              |
| kerite 3        | G017811 | mature              |
| kerite 4        | G017812 | very mature/OM lean |
| kerite 5        | G017813 | mature              |
| kerite 6        | G017814 | mature              |
| kerite 7        | G017815 | mature              |
| 9 topaz with OM | G017816 | very mature/OM lean |

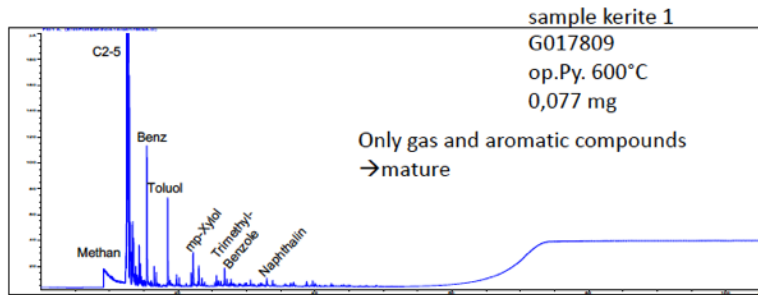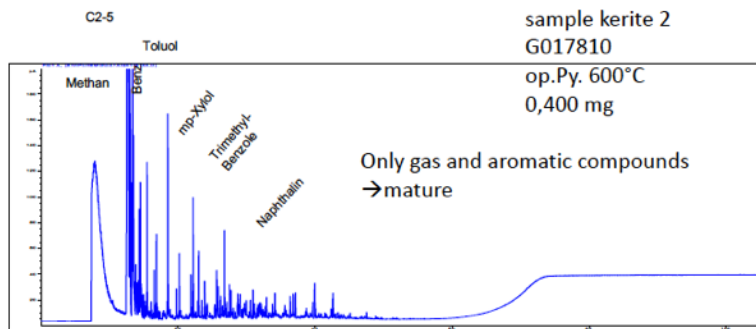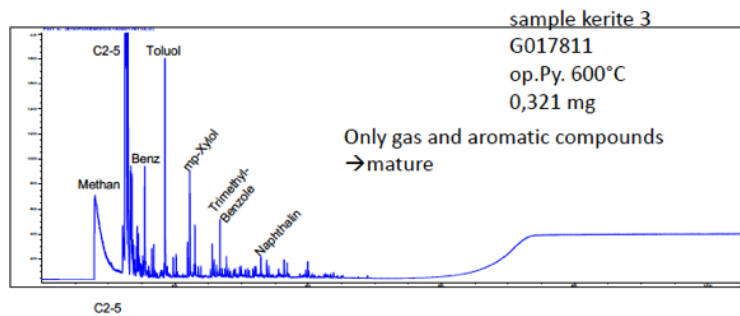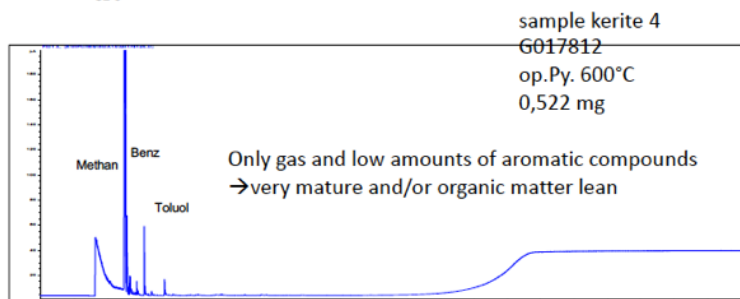

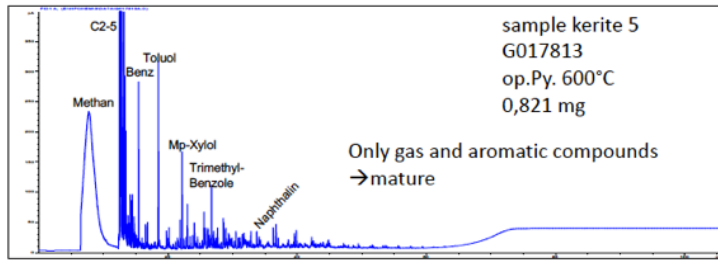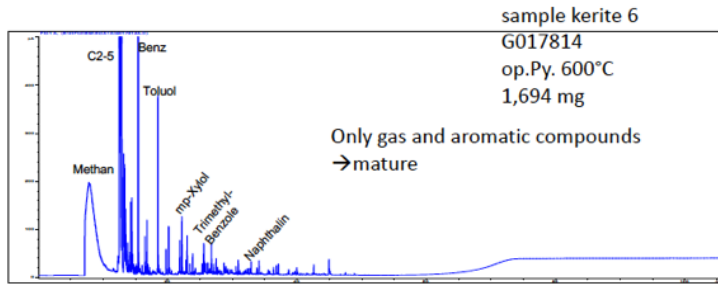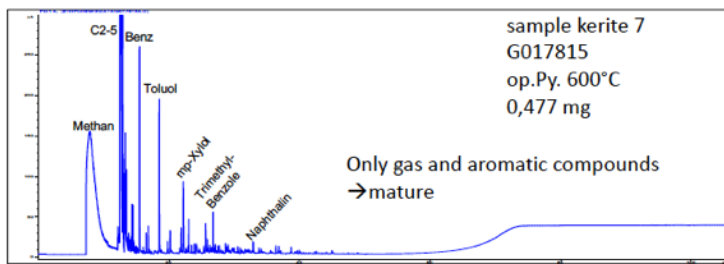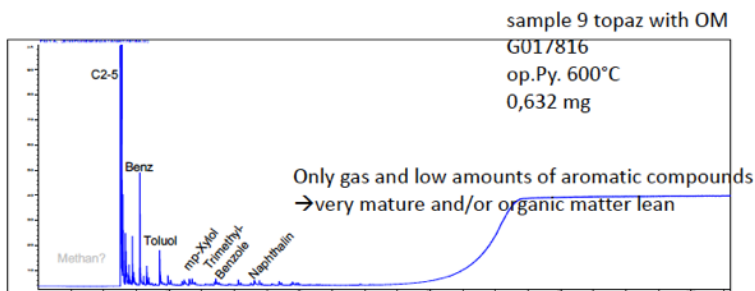

Fig. S9: Pyrolysis results of samples kerite 1 to 7, and OM sample 9.



Table S1: Trace and major elements of black opal; samples BO31, 41 and 72 were used for U-Pb age determination

| Element | Signal    | BO31<br>µg/g | BO41<br>µg/g | BO72<br>µg/g |
|---------|-----------|--------------|--------------|--------------|
| As      | As75(HR)  | 0.04         | 0.17         | 0.05         |
| Ba      | Ba137(LR) | 0.10         | 16.27        | 6.71         |
| Be      | Be9(MR)   | 0.07         | 5.82         | 8.24         |
| Cd      | Cd114(LR) | 0.00         | 0.02         | 0.01         |
| Co      | Co59(MR)  | 0.02         | 0.74         | 0.47         |
| Cr      | Cr52(MR)  | 0.13         | 1.79         | 3.04         |
| Cs      | Cs133(MR) | 0.01         | 0.79         | 0.02         |
| Cu      | Cu63(MR)  | 0.49         | 0.89         | 0.21         |
| Ga      | Ga69(MR)  | 0.02         | 0.84         | 0.29         |
| Hf      | Hf178(LR) | 0.00         | 1.18         | 0.60         |
| Li      | Li7(LR)   | 5.13         | 79.13        | 0.24         |
| Mo      | Mo98(MR)  | 0.03         | 0.62         | 0.50         |
| Nb      | Nb93(MR)  | 0.16         | 0.72         | 0.77         |
| Ni      | Ni60(MR)  | 0.12         | 0.85         | 0.64         |
| Pb      | tot       | 0.92         | 2.06         | 0.08         |
| Rb      | Rb85(MR)  | 0.07         | 24.68        | 1.23         |
| Sc      | Sc45(MR)  | 0.01         | 2.94         | 2.50         |
| Sn      | Sn118(LR) | 0.06         | 0.41         | 0.22         |
| Sr      | Sr86(MR)  | 0.07         | 4.26         | 4.30         |
| Ta      | Ta181(LR) | 0.01         | 0.12         | 0.04         |
| Th      | Th232(LR) | 0.00         | 9.88         | 0.66         |
| U       | U238(LR)  | 0.01         | 11.48        | 3.60         |
| V       | V51 (HR)  | 0.02         | 5.68         | 10.40        |
| W       | W182(HR)  | 0.02         | 0.54         | 0.13         |
| Zn      | Zn66(MR)  | 0.50         | 29.53        | 4.95         |
| Zr      | Zr90(MR)  | 0.11         | 72.17        | 73.01        |

| Analysis No.       | Sample V-2008 EMPA |      |       |       |
|--------------------|--------------------|------|-------|-------|
|                    | 1                  | 2    | 3     | 4     |
| Oxide              | wt%                | wt%  | wt%   | wt%   |
| SiO2               | 95.84              | 96.8 | 95.32 | 95.43 |
| TiO2               | 0.009              | bd   | 0.013 | 0.003 |
| Al2O3              | 0.75               | 0.61 | 0.71  | 1.01  |
| Cr2O3              | 0.01               | 0.01 | 0.01  | 0.02  |
| V2O3               | bd                 | bd   | bd    | 0.02  |
| MgO                | 0.07               | 0.06 | 0.08  | 0.08  |
| FeO                | 0.18               | 0.10 | 0.16  | 0.31  |
| MnO                | 0.01               | 0.02 | bd    | bd    |
| CaO                | 0.26               | 0.23 | 0.28  | 0.33  |
| Na2O               | 0.03               | 0.02 | 0.02  | 0.15  |
| K2O                | 0.06               | 0.05 | 0.05  | 0.10  |
| Total              | 97.21              | 97.9 | 96.64 | 97.44 |
| bd below detection |                    |      |       |       |

Table S2: U-Th isotope data

| Material | g sample weight | g sample solution | g spike (U-Th) | 235U/238U | SD (%) | 230Th/232Th | SD (%) | 238U (pmol) | 2ε (%) | 235U (pmol) | 2ε (%) | 232Th (pmol) | 2ε (%) | 238U/232Th | 238U/204Pb | 1ε (% est.) | 232Th/204Pb | 1ε (% est.) |
|----------|-----------------|-------------------|----------------|-----------|--------|-------------|--------|-------------|--------|-------------|--------|--------------|--------|------------|------------|-------------|-------------|-------------|
| UKR1     | 0.00253         | 0.1006            | 0.03704        | 1.782     | 0.33   | 4.272       | 7.2    | 1.088       | 0.66   | 0.007888    | 0.66   | 0.09913      | 14.4   | 10.97      | 29425      | 5           | 2682        | 5           |
| UKR2     | 0.0009          | 0.1002            | 0.03029        | 4.104     | 0.41   | 6.485       | 3.73   | 0.3847      | 0.82   | 0.00279     | 0.82   | 0.03578      | 7.46   | 10.75      | 790        | 5           | 73.4        | 5           |
| UKR3     | 0.00101         | 0.1               | 0.03088        | 3.496     | 0.64   | 6.304       | 2.78   | 0.4608      | 1.28   | 0.003342    | 1.28   | 0.03903      | 5.56   | 11.8       | 16765      | 5           | 1420        | 5           |
| UKR4     | 0.00038         | 0.0974            | 0.03053        | 6.226     | 0.43   | 1.335       | 2.61   | 0.2551      | 0.86   | 0.00185     | 0.86   | 0.3758       | 5.22   | 0.6787     | 235        | 5           | 34.5        | 5           |
| UKR5     | 0.00043         | 0.0989            | 0.02973        | 3.782     | 0.68   | 1.621       | 2.12   | 0.4098      | 1.36   | 0.002972    | 1.36   | 0.2925       | 4.24   | 1.401      | 137        | 5           | 97.98       | 5           |
| UKR6     | 0.00067         | 0.0987            | 0.03078        | 7.544     | 0.64   | 2.844       | 1.9    | 0.212       | 1.28   | 0.001538    | 1.28   | 0.15         | 3.8    | 1.413      | 130        | 5           | 92          | 5           |

Table S3: Pb-isotope data black opal

| Sample            | weight (g) | ppm U | ppm Th | ppm Pb tot. | 206Pb/204Pb | SD (%) | 207Pb/204Pb | SD (%) | 208Pb/204Pb | SD (%) | 232Th/204Pb | SD (%) | 238U/204Pb | SD (%) |
|-------------------|------------|-------|--------|-------------|-------------|--------|-------------|--------|-------------|--------|-------------|--------|------------|--------|
| BO 1-1 black opal | 0.00633    | 7.490 | 2.181  | 0.743       | 66.57       | 0.34   | 18.02       | 0.50   | 70.19       | 0.21   | 405.9       | 1.46   | 1394.68    | 3.82   |
| BO 1-2 black opal | 0.01036    | 19.40 | 11.812 | 1.537       | 62.08       | 0.42   | 17.93       | 0.79   | 66.51       | 0.40   | 1005        | 1.60   | 1654.77    | 6.15   |
| BO 2-1 feldspar   | 0.00488    | 0.378 | 0.701  | 13.148      | 16.46       | 0.69   | 15.58       | 0.26   | 36.22       | 0.40   | 1.625       | 0.59   | 0.88       | 7.43   |
| BO 2-2 black opal | 0.00621    | 37.17 | 18.685 | 5.142       | 61.2        | 0.16   | 18.81       | 0.40   | 70.92       | 0.55   | 489.7       | 0.55   | 974.20     | 3.11   |
| BO 3-1 black opal | 0.02216    | 0.014 | 0.004  | 0.861       | 19.35       | 0.51   | 15.69       | 0.49   | 38.94       | 0.42   | 0.329       | 20.70  | 1.06       | 1.4    |
| BO 3-2 black opal | 0.00802    | 0.067 | 0.019  | 0.727       | 25.25       | 0.64   | 16.12       | 0.18   | 43.18       | 0.63   | 1.932       | 6.97   | 6.91       | 1.41   |
| BO 4-1 black opal | 0.01392    | 13.00 | 9.618  | 1.916       | 104.2       | 1.13   | 19.36       | 0.83   | 68.48       | 0.96   | 860.8       | 2.22   | 1163.12    | 4.92   |
| BO 4-2 black opal | 0.0269     | 0.065 | 0.042  | 0.376       | 18.85       | 0.37   | 15.75       | 0.54   | 38.64       | 0.49   | 7.229       | 13.40  | 11.35      | 0.62   |
| BO 5-1 black opal | 0.01289    | 7.527 | 0.300  | 0.145       | 44.89       | 0.57   | 16.69       | 0.70   | 41.74       | 1.02   | 191.1       | 1.83   | 4800.48    | 0.71   |
| BO 5-2 black opal | 0.01489    | 7.586 | 0.327  | 0.094       | 69.09       | 0.53   | 16.86       | 0.14   | 41.77       | 0.27   | 398.8       | 2.20   | 9241.76    | 3.46   |
| BO 6-1 black opal | 0.00894    | 5.672 | 0.641  | 0.116       | 152.3       | 5.81   | 21.11       | 5.46   | 53.02       | 5.25   | 1.114       | 6.74   | 9866.42    | 2.39   |
| BO 7-1 black opal | 0.01646    | 3.786 | 0.617  | 0.076       | 302.2       | 4.61   | 20.7        | 5.49   | 54.99       | 3.65   | 2722        | 4.96   | 16700.50   | 1.88   |
| BO 7-2 black opal | 0.02329    | 4.400 | 0.659  | 0.079       | 167.1       | 2.20   | 18.29       | 3.13   | 45.86       | 2.79   | 1713        | 1.35   | 11450.34   | 4.69   |
